# Supplementary material for: Carbon phosphide nanosheets and nanoribbons: insights on modulating their electronic properties by first principles calculations
Source: Royal Society of Chemistry journal article supplement (doi:10.1039/d0cp03615c), 2020-01-01
Supplement: d0cp03615c1.pdf [file d0cp03615c1.pdf]

# Carbon phosphide nanosheet and nanoribbon: insights on modulating their electronic properties by first principles calculations

Tong Chen, Huili Li, Yuyuan Zhu, Desheng Liu, Guanghui Zhou, and Liang Xu

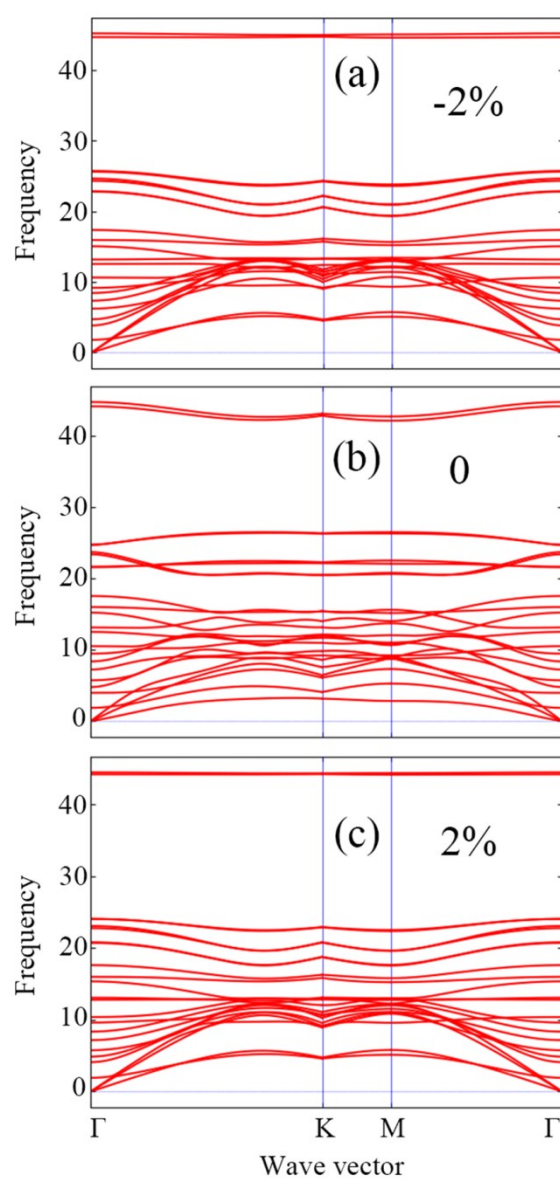

Fig. S1 (a)-(c) Phonon dispersion for 2D CP nanosheets under different strains of -2%, 0, +2% along the biaxial direction.

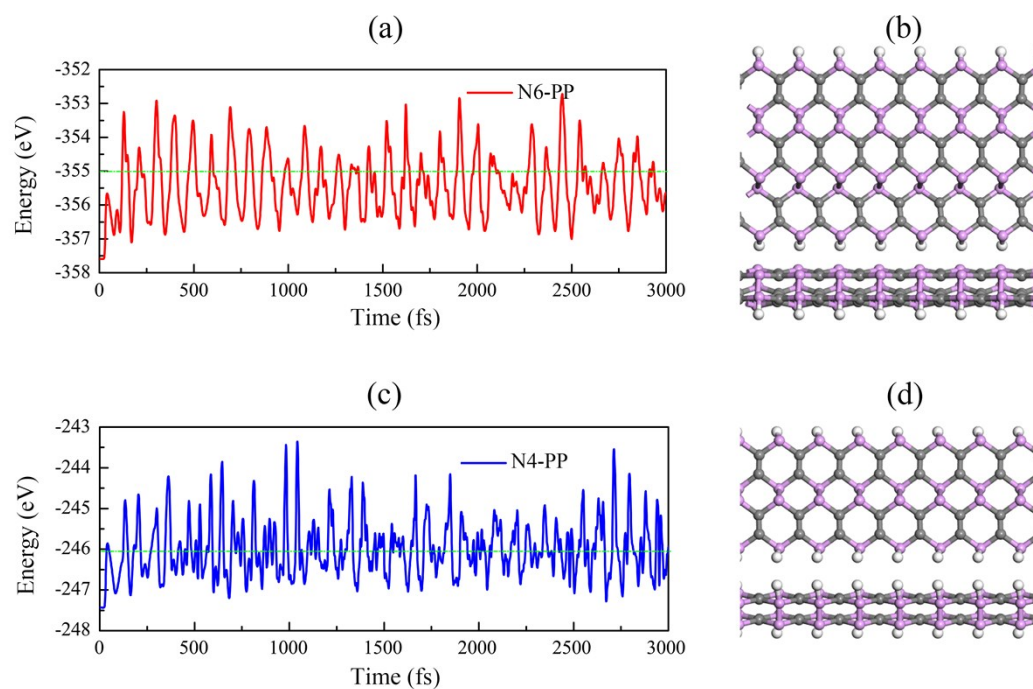

Fig. 2S (a) and (c) Variation of the free energy of N6-PP and N4-PP in the molecular dynamics simulation at room temperature during the time scale of 3.0 ps, respectively. (b) and (d) The final structures of N6-PP and N4-PP in the molecular dynamics simulation.
